# Supplementary material for: Acute Impact of Fine Particulate Air Pollution on Cardiac Arrhythmias in a Population‐Based Sample of Adolescents: The Penn State Child Cohort
Source: PubMed Central journal article supplement — J Am Heart Assoc. 2022 Sep 14;11(18):e026370. doi: 10.1161/JAHA.122.026370 (PMC9683666; doi:10.1161/jaha.122.026370), 2022-09-14
Supplement: JAH3-11-e026370-s001.pdf [file JAH3-11-e026370-s001.pdf]

## **SUPPLEMENTAL MATERIAL**

**Table S1. Comparison of participant characteristics between adolescents with and without PM<sub>2.5</sub> data.**

|                           | With PM <sub>2.5</sub><br>(N=322) | Without PM <sub>2.5</sub><br>(N=99) | P value * |
|---------------------------|-----------------------------------|-------------------------------------|-----------|
| Age (years)               | 16.95±2.25                        | 17.88±2.24                          | 0.77      |
| Male (n, %)               | 180, 55.90%                       | 47, 47.47%                          | 0.14      |
| Non-Hispanic white (n, %) | 255, 79.19%                       | 74, 74.75%                          | 0.35      |
| BMI percentile            | 65.35±29.09                       | 65.35±26.12                         | 0.99      |
| PAC (count)               | 0.47±3.00                         | 0.44±1.70                           | 0.65      |
| PVC (count)               | 0.36±3.09                         | 0.34±2.27                           | 0.87      |

Data are presented as mean±SD for continuous variables and n, percentage for binary variables.

\*: T-test and chi-square tests were used to obtain p values.

**Table S2. Rate Ratio (95% C) in association between 10 $\mu\text{g}/\text{m}^3$  increase in PM<sub>2.5</sub> concentration and number of cardiac arrhythmias from models with different numbers of lag terms.**

|               | PAC                  |       | PVC                  |       |
|---------------|----------------------|-------|----------------------|-------|
|               | Rate Ratio (95% CI)  | p     | Rate Ratio (95% CI)  | p     |
| Lag 0 model   |                      |       |                      |       |
| Lag 0         | 0.982 (0.951, 1.036) | 0.39  | 1.010 (0.992, 1.029) | 0.28  |
| Lag 0-1 model |                      |       |                      |       |
| Lag 0         | 0.992 (0.983, 1.001) | 0.25  | 0.998 (0.983, 1.012) | 0.77  |
| Lag 1         | 0.996 (0.987, 1.006) | 0.41  | 1.036 (1.020, 1.053) | <0.01 |
| Cumulative    | 0.988 (0.971, 1.009) | 0.23  | 1.034 (1.005, 1.064) | 0.02  |
| Lag 0-2 model |                      |       |                      |       |
| Lag 0         | 0.994 (0.987, 1.002) | 0.12  | 0.996 (0.980, 1.012) | 0.61  |
| Lag 1         | 0.997 (0.990, 1.004) | 0.43  | 1.030 (1.017, 1.044) | <0.01 |
| Lag 2         | 1.001 (0.993, 1.009) | 0.91  | 1.017 (1.004, 1.030) | 0.01  |
| Cumulative    | 0.988 (0.970, 1.007) | 0.22  | 1.043 (1.006, 1.083) | 0.02  |
| Lag 0-3 model |                      |       |                      |       |
| Lag 0         | 0.995 (0.989, 1.002) | 0.17  | 0.998 (0.983, 1.013) | 0.76  |
| Lag 1         | 0.998 (0.990, 1.003) | 0.25  | 1.015 (1.004, 1.027) | <0.01 |
| Lag 2         | 1.000 (0.995, 1.006) | 0.88  | 1.022 (1.011, 1.033) | <0.01 |
| Lag 3         | 1.003 (0.998, 1.009) | 0.25  | 1.016 (1.002, 1.029) | 0.02  |
| Cumulative    | 0.989 (0.970, 1.009) | 0.27  | 1.051 (1.002, 1.102) | 0.04  |
| Lag 0-4 model |                      |       |                      |       |
| Lag 0         | 0.992 (0.983, 1.001) | 0.09  | 0.999 (0.985, 1.012) | 0.85  |
| Lag 1         | 0.996 (0.990, 1.002) | 0.23  | 1.006 (0.995, 1.012) | 0.27  |
| Lag 2         | 0.999 (0.995, 1.004) | 0.71  | 1.013 (1.003, 1.023) | 0.01  |
| Lag 3         | 1.003 (0.998, 1.007) | 0.28  | 1.019 (1.008, 1.029) | <0.01 |
| Lag 4         | 1.005 (0.999, 1.011) | 0.10  | 1.024 (1.011, 1.137) | <0.01 |
| Cumulative    | 0.990 (0.969, 1.012) | 0.37  | 1.061 (1.005, 1.121) | 0.03  |
| Lag 0-5 model |                      |       |                      |       |
| Lag 0         | 0.996 (0.990, 1.002) | 0.44  | 0.999 (0.987, 1.012) | 0.91  |
| Lag 1         | 0.997 (0.993, 1.002) | 0.31  | 1.005 (0.995, 1.016) | 0.30  |
| Lag 2         | 0.999 (0.994, 1.002) | 0.67  | 1.010 (1.001, 1.020) | 0.03  |
| Lag 3         | 1.000 (0.996, 1.003) | 0.88  | 1.015 (1.005, 1.024) | <0.01 |
| Lag 4         | 1.004 (1.000, 1.009) | 0.07  | 1.018 (1.007, 1.028) | <0.01 |
| Lag 5         | 1.009 (1.003, 1.016) | <0.01 | 1.020 (1.007, 1.032) | <0.01 |
| Cumulative    | 0.992 (0.969, 1.016) | 0.50  | 1.068 (1.004, 1.137) | 0.04  |
| Lag 0-6 model |                      |       |                      |       |
| Lag 0         | 0.994 (0.990, 1.001) | 0.09  | 1.003 (0.990, 1.015) | 0.64  |
| Lag 1         | 0.996 (0.993, 1.002) | 0.20  | 0.998 (0.987, 1.009) | 0.70  |
| Lag 2         | 0.998 (0.995, 1.003) | 0.18  | 0.998 (0.988, 1.008) | 0.65  |
| Lag 3         | 1.001 (0.998, 1.005) | 0.53  | 1.002 (0.993, 1.012) | 0.64  |
| Lag 4         | 1.003 (0.999, 1.007) | 0.10  | 1.012 (1.003, 1.020) | <0.01 |
| Lag 5         | 1.004 (1.000, 1.009) | 0.04  | 1.026 (1.018, 1.034) | <0.01 |

|                |                      |      |                      |       |
|----------------|----------------------|------|----------------------|-------|
| Lag 6          | 1.004 (0.999, 1.009) | 0.08 | 1.046 (1.037, 1.054) | <0.01 |
| Cumulative     | 0.992 (0.967, 1.017) | 0.53 | 1.086 (1.018, 1.159) | 0.01  |
| <hr/>          |                      |      |                      |       |
| Lag 0-7 model  |                      |      |                      |       |
| Lag 0          | 0.993 (0.987, 1.001) | 0.08 | 0.996 (0.984, 1.009) | 0.54  |
| Lag 1          | 0.997 (0.995, 1.001) | 0.17 | 0.999 (0.989, 1.009) | 0.84  |
| Lag 2          | 0.999 (0.995, 1.002) | 0.37 | 1.003 (0.994, 1.011) | 0.59  |
| Lag 3          | 1.002 (0.998, 1.006) | 0.29 | 1.007 (0.998, 1.015) | 0.11  |
| Lag 4          | 1.004 (1.000, 1.008) | 0.06 | 1.011 (1.004, 1.019) | <0.01 |
| Lag 5          | 1.004 (1.000, 1.008) | 0.04 | 1.017 (1.009, 1.025) | <0.01 |
| Lag 6          | 1.003 (0.999, 1.007) | 0.16 | 1.023 (1.015, 1.031) | <0.01 |
| Lag 7          | 1.000 (0.995, 1.005) | 0.97 | 1.030 (1.020, 1.039) | <0.01 |
| Cumulative     | 0.992 (0.965, 1.019) | 0.54 | 1.087 (1.013, 1.167) | 0.02  |
| <hr/>          |                      |      |                      |       |
| Lag 0-8 model  |                      |      |                      |       |
| Lag 0          | 0.994 (0.989, 1.001) | 0.10 | 0.995 (0.982, 1.007) | 0.40  |
| Lag 1          | 0.997 (0.991, 1.002) | 0.21 | 0.999 (0.989, 1.009) | 0.89  |
| Lag 2          | 0.998 (0.995, 1.002) | 0.29 | 1.004 (0.996, 1.012) | 0.38  |
| Lag 3          | 1.002 (0.998, 1.005) | 0.31 | 1.008 (1.000, 1.015) | 0.04  |
| Lag 4          | 1.004 (1.000, 1.008) | 0.05 | 1.011 (1.004, 1.018) | <0.01 |
| Lag 5          | 1.004 (1.001, 1.008) | 0.02 | 1.014 (1.007, 1.021) | <0.01 |
| Lag 6          | 1.004 (1.000, 1.007) | 0.06 | 1.017 (1.009, 1.025) | <0.01 |
| Lag 7          | 1.001 (0.998, 1.005) | 0.53 | 1.019 (1.009, 1.029) | <0.01 |
| Lag 8          | 0.998 (0.993, 1.002) | 0.27 | 1.021 (1.008, 1.033) | <0.01 |
| Cumulative     | 0.991 (0.963, 1.020) | 0.53 | 1.090 (1.008, 1.179) | 0.03  |
| <hr/>          |                      |      |                      |       |
| Lag 0-9 model  |                      |      |                      |       |
| Lag 0          | 0.988 (0.980, 1.001) | 0.08 | 0.996 (0.984, 1.008) | 0.48  |
| Lag 1          | 0.996 (0.994, 1.002) | 0.24 | 0.998 (0.988, 1.008) | 0.75  |
| Lag 2          | 0.998 (0.995, 1.001) | 0.17 | 1.001 (0.993, 1.010) | 0.79  |
| Lag 3          | 1.001 (0.998, 1.004) | 0.60 | 1.004 (0.997, 1.012) | 0.29  |
| Lag 4          | 1.003 (0.999, 1.007) | 0.12 | 1.007 (1.000, 1.014) | 0.04  |
| Lag 5          | 1.004 (1.000, 1.008) | 0.04 | 1.010 (1.004, 1.017) | <0.01 |
| Lag 6          | 1.004 (1.000, 1.007) | 0.04 | 1.014 (1.007, 1.020) | <0.01 |
| Lag 7          | 1.003 (0.999, 1.006) | 0.11 | 1.017 (1.010, 1.024) | <0.01 |
| Lag 8          | 1.000 (0.999, 1.006) | 0.83 | 1.020 (1.013, 1.028) | <0.01 |
| Lag 9          | 0.999 (0.997, 1.002) | 0.62 | 1.024 (1.015, 1.033) | <0.01 |
| Cumulative     | 0.991 (0.963, 1.020) | 0.55 | 1.095 (1.011, 1.186) | 0.03  |
| <hr/>          |                      |      |                      |       |
| Lag 0-10 model |                      |      |                      |       |
| Lag 0          | 0.989 (0.985, 1.002) | 0.09 | 0.995 (0.983, 1.007) | 0.41  |
| Lag 1          | 0.996 (0.991, 1.003) | 0.30 | 0.999 (0.989, 1.009) | 0.80  |
| Lag 2          | 0.998 (0.995, 1.004) | 0.18 | 1.002 (0.994, 1.010) | 0.58  |
| Lag 3          | 1.001 (0.997, 1.004) | 0.73 | 1.005 (0.999, 1.012) | 0.12  |
| Lag 4          | 1.003 (0.999, 1.007) | 0.19 | 1.008 (1.002, 1.014) | <0.01 |
| Lag 5          | 1.004 (0.999, 1.008) | 0.07 | 1.011 (1.005, 1.016) | <0.01 |
| Lag 6          | 1.004 (1.000, 1.008) | 0.04 | 1.012 (1.007, 1.018) | <0.01 |
| Lag 7          | 1.003 (0.999, 1.006) | 0.06 | 1.014 (1.008, 1.020) | <0.01 |
| Lag 8          | 1.001 (0.999, 1.004) | 0.25 | 1.016 (1.009, 1.022) | <0.01 |
| Lag 9          | 0.999 (0.996, 1.001) | 0.36 | 1.016 (1.007, 1.025) | <0.01 |

|                |                      |      |                      |       |
|----------------|----------------------|------|----------------------|-------|
| Lag 10         | 0.998 (0.995, 1.002) | 0.14 | 1.016 (1.005, 1.127) | <0.01 |
| Cumulative     | 0.991 (0.962, 1.020) | 0.53 | 1.097 (1.008, 1.194) | 0.03  |
| <hr/>          |                      |      |                      |       |
| Lag 0-11 model |                      |      |                      |       |
| Lag 0          | 0.990 (0.987, 1.002) | 0.11 | 0.998 (0.985, 1.010) | 0.70  |
| Lag 1          | 0.994 (0.991, 1.003) | 0.24 | 0.999 (0.989, 1.009) | 0.86  |
| Lag 2          | 1.000 (0.997, 1.004) | 0.16 | 1.001 (0.993, 1.009) | 0.95  |
| Lag 3          | 1.000 (0.997, 1.004) | 0.86 | 1.003 (0.996, 1.009) | 0.45  |
| Lag 4          | 1.002 (0.999, 1.006) | 0.24 | 1.005 (0.999, 1.010) | 0.13  |
| Lag 5          | 1.003 (0.999, 1.007) | 0.08 | 1.007 (1.001, 1.012) | 0.02  |
| Lag 6          | 1.004 (1.000, 1.007) | 0.04 | 1.009 (1.003, 1.014) | <0.01 |
| Lag 7          | 1.003 (1.000, 1.007) | 0.04 | 1.011 (1.005, 1.016) | <0.01 |
| Lag 8          | 1.002 (0.999, 1.005) | 0.12 | 1.013 (1.007, 1.019) | <0.01 |
| Lag 9          | 1.000 (0.998, 1.003) | 0.85 | 1.016 (1.008, 1.023) | <0.01 |
| Lag 10         | 0.998 (0.995, 1.001) | 0.11 | 1.018 (1.009, 1.027) | <0.01 |
| Lag 11         | 0.998 (0.994, 1.001) | 0.29 | 1.021 (1.009, 1.032) | <0.01 |
| Cumulative     | 0.989 (0.959, 1.021) | 0.50 | 1.102 (1.007, 1.021) | 0.03  |
| <hr/>          |                      |      |                      |       |
| Lag 0-12 model |                      |      |                      |       |
| Lag 0          | 0.991 (0.988, 1.002) | 0.23 | 0.998 (0.986, 1.010) | 0.73  |
| Lag 1          | 0.995 (0.992, 1.006) | 0.48 | 0.999 (0.989, 1.009) | 0.84  |
| Lag 2          | 0.998 (0.995, 1.001) | 0.15 | 1.000 (0.992, 1.009) | 0.96  |
| Lag 3          | 1.000 (0.997, 1.003) | 0.99 | 1.002 (0.994, 1.010) | 0.67  |
| Lag 4          | 1.002 (0.998, 1.010) | 0.30 | 1.003 (0.997, 1.010) | 0.35  |
| Lag 5          | 1.003 (0.999, 1.011) | 0.09 | 1.005 (0.999, 1.011) | 0.12  |
| Lag 6          | 1.003 (1.000, 1.012) | 0.04 | 1.007 (1.001, 1.012) | 0.02  |
| Lag 7          | 1.003 (1.000, 1.014) | 0.03 | 1.009 (1.003, 1.014) | <0.01 |
| Lag 8          | 1.003 (0.999, 1.016) | 0.06 | 1.011 (1.005, 1.016) | <0.01 |
| Lag 9          | 1.001 (0.999, 1.019) | 0.30 | 1.013 (1.007, 1.019) | <0.01 |
| Lag 10         | 0.999 (0.998, 1.022) | 0.56 | 1.016 (1.009, 1.022) | <0.01 |
| Lag 11         | 1.003 (1.001, 1.005) | 0.01 | 1.018 (1.010, 1.026) | <0.01 |
| Lag 12         | 0.997 (0.994, 1.001) | 0.61 | 1.021 (1.011, 1.030) | <0.01 |
| Cumulative     | 0.989 (0.957, 1.021) | 0.49 | 1.105 (1.006, 1.021) | 0.04  |

All models controlled for age, race, sex, BMI percentile, temperature, and relative humidity.

**Table S3. Rate ratios (95% CI) and p-value in association between 10  $\mu\text{g}/\text{m}^3$  increment of  $\text{PM}_{2.5}$  concentration and PVC counts after truncating  $\text{PM}_{2.5}$  and temperature.**

|                               | Model 1*             |         | Model 2†             |         |
|-------------------------------|----------------------|---------|----------------------|---------|
|                               | RR (95% CI)          | p-value | RR (95% CI)          | p-value |
| Lag-0 (instantaneous)         | 1.002 (0.979, 1.025) | 0.89    | 0.967 (0.920, 1.018) | 0.20    |
| Lag-1 (0.5-1.0 hours prior)   | 1.018 (1.002, 1.036) | 0.03    | 1.022 (1.005, 1.039) | <0.01   |
| Lag-2 (1.0-1.5 hours prior)   | 1.023 (1.006, 1.041) | <0.01   | 1.037 (1.021, 1.055) | <0.01   |
| Lag-3 (1.5-2.0 hours prior)   | 1.017 (1.001, 1.040) | 0.03    | 1.032 (1.014, 1.052) | <0.01   |
| Cumulative (within 2.0 hours) | 1.062 (1.001, 1.146) | 0.05    | 1.060 (1.005, 1.141) | 0.04    |

\*: Model 1 adjusted for age, race, sex, BMI percentile, temperature, and relative humidity.

†: Model 2 adjusted for age, race, sex, BMI percentile, physical activity level, self-reported exposure to cigarette smoking, temperature, relatively humidity.

**Figure S1. Comparison of EKG characteristics of normal heartbeat, PAC, and PVC**

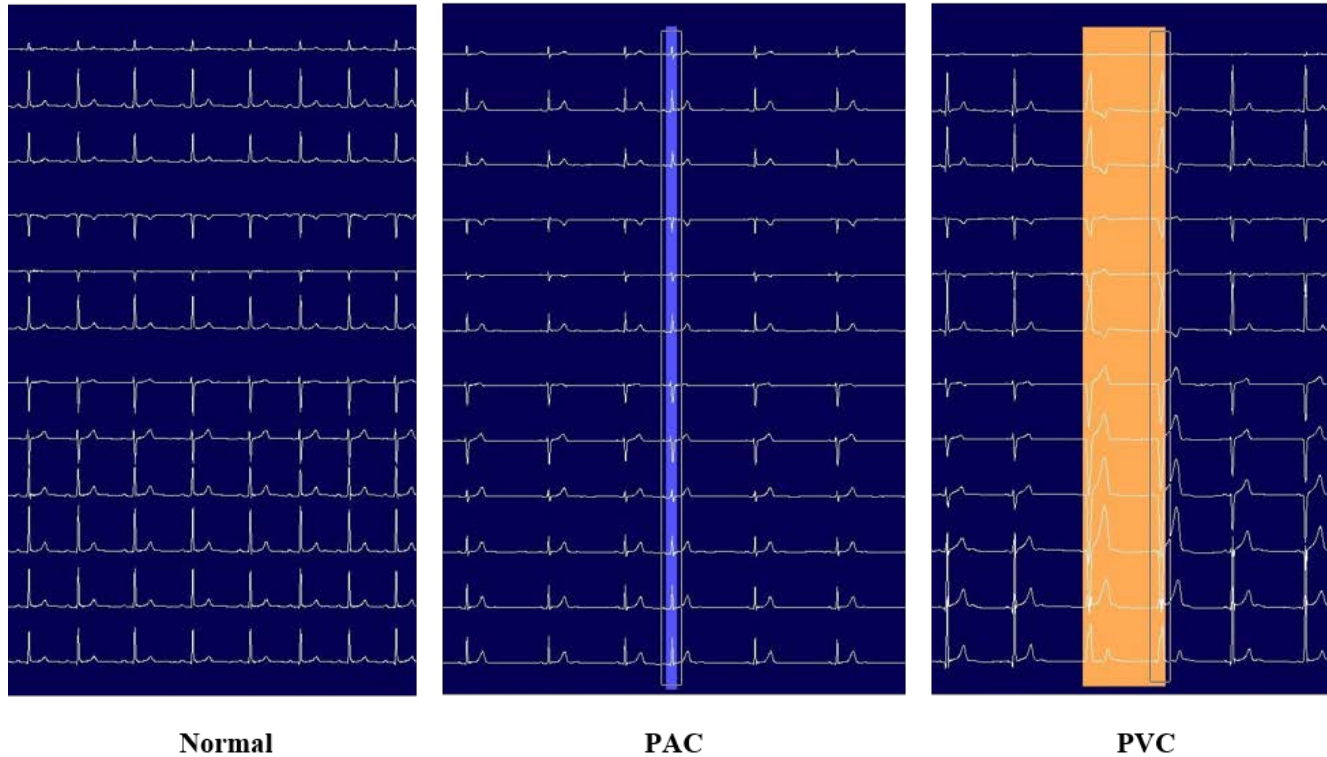

EKG: Electrocardiogram

PAC: Premature atrial contractions. Defined as a premature heart beat with  $\geq 25\%$  reduction in the R-R interval compare to the immediate prior R-R interval.

PVC: Premature ventricular contraction. Characterized by an absence of P wave and a premature QRS complex with an abnormally large width and amplitude on EKG.
